# Supplementary material
Source: PubMed Central journal article supplement (PMC3838570)
Supplement: NIHMS524547-supplement-06.pdf [file NIHMS524547-supplement-06.pdf]

## Supplementary Information

### Supplementary Figure Legends

**Supplementary Figure 1.** Preliminary evaluation of *piggyBac* and *Sleeping Beauty* reporter expression in HEK 293 cells. Average luciferase expression three days and three weeks after transfection, measured in relative light units/mg protein.

Transfections were performed in triplicate using equimolar amounts of DNA for the conventional plasmid, pcDNA3-luc; *Sleeping Beauty* transposase, SB100x with luciferase transposon, pT2/c-luciferase; and helper-independent *piggyBac* plasmids, pmGENIE2-luc and pmGENIE3-luc.

**Supplementary Figure 2.** Evaluation of the AT and TTAA content of the chromosomal DNA sequences surrounding the *in vitro* and *in vivo* *piggyBac* integration sites. **(a)** The AT base percentages in an evenly distributed 2.0 kilobase (kb) window surrounding the sites of *piggyBac* integration events on chromosomes 6, 13, 14, and X from all liver samples transfected with pmGENIE3-luc were analyzed and averaged. **(b)** Analysis of the average number of TTAA dinucleotide sequences in the same 2.0 kb window.

**Supplementary Tables**

| <i>In vitro</i> transposition site sequences in MEF 3T3 cells                                                                                                                                                                                                                                                                                                                                                                                                                                                                                                                                                                                                                                                                                                                                                                                                                            | mCh. No. |
|------------------------------------------------------------------------------------------------------------------------------------------------------------------------------------------------------------------------------------------------------------------------------------------------------------------------------------------------------------------------------------------------------------------------------------------------------------------------------------------------------------------------------------------------------------------------------------------------------------------------------------------------------------------------------------------------------------------------------------------------------------------------------------------------------------------------------------------------------------------------------------------|----------|
| <p>agtggcacagcagttaggAGAGGGAACTTGTAGAGTCCATCTTCAGTAGAAAGACAGGGCATCAA<br/>GTGGAGGGATGGGGTTGCCATCCAACAGTCAAAAACCTCTGACCCAGAATTGTTCTGTCT<br/>AAAAGAACTCCAGCAACAAAAATGAAGAGGAGACTGAGGGAAAGAAAGGCAGTCCAGTGA<br/>CTGGCCCAACTTGAGATCCATCTCAAGGAGAGTCTCTAAGACCTGACACTAACTGATGCTA<br/>TGGTGTGCTTATAGATATGAGCCTAGCATGGCTGTCTCCAAGAGGCCCAACAAGCAGCT<br/>GGCTGAGACATTTGCAGATACTTAAACCCAACCAATTCAGTGCAGTAAAGCACTAAAAGGA<br/>AAACTTTTGCTTGAATTAGGGAATGGCTGGAAGAAGCTGAGGAGGAGGGCAACCCCATAG<br/>GAAAACAGCAGTCTTAATTAACCTGGAACAGAGCTCTCTCAGACACAGAGCCACCAAC<br/>CAGGAAGCATACATGAGCTGGTCTGAGGCCCA</p>                                                                                                                                                                                                                                                                                                      | 15       |
| <p>agtggcacagcagttaggAGAGTGGACTTGAACCAGATCTCTGGGTCTGAGTGGCAGCTAAGC<br/>TATTTAATAGTTGTATAGCTTTGAAAAATTAGCTAGCCACTCTGTGCCCTTCATTTTAATCT<br/>TTGAACGAGCATATTTTCAACCCATACAATTGCTGTGAGGATCAAACACATAAACAATTAGT<br/>ACAGTTGTTGGTGTA</p>                                                                                                                                                                                                                                                                                                                                                                                                                                                                                                                                                                                                                                                         | 9        |
| <p>agtggcacagcagttaggGATGCAGTCAGCCTGCTGGATTCAAACCTCCAGCCTGGCCACTCCCA<br/>GCTGTACTTCAGCAACTGCTTGACCTCTCTTTGTGACTTGATTTTCTCATCTACAAAATAAA<br/>ACAATAAAGGCTATCAGTCACCTCAGGACTGGAGAGGCGGCTCAGTGGTTAGAGCACTCA<br/>AATAGCTTCGGTGCATCTGCCGCCACCGACAGAGCTGCCCCACCCTTCCTTCAAAGTCGT<br/>GATGGATTAAGACCCTCTGAAACCTGAAGCTGAAATCAACCCCCCTCTCTTAATCCGAGT<br/>CAGTTATTCTGTGCAATAATACAAAAGGAATACAGAGCTCGCTTATCTTCAGCTTCCGTAT<br/>ATGGTGTGGGGCTTCTCAAACGGTTTGATTTAAATTTA</p>                                                                                                                                                                                                                                                                                                                                                                                                                              | 9        |
| <p>agtggcacagcagttaggAAGTAGCAACAAAATAGTTTTATGGCTGGGGCTCACCACAGTATGTGA<br/>AACTCTATTTAAAAGTTGAATCATTAGGAGTTTTGAGAAGCACTGGTTTTAAAGTAAGTGAA<br/>TTGAAAAACACAACATGAGAGTATAAAGATGAGAAGCTGGACTTTTTATGACATACTTTGGA<br/>TTTTTTTTCTTTTCTATGAAAAAGAAAGCAGAACAGTGCATTGTCTTTAAAACCTGAAGTC<br/>TCTAGTCCTAAGCTAACGAATTCATTTCCACATTTGACTTAATGCCCCAGAGATAACAGTCC<br/>TTTGGAAATTTTTTCATTTACAGTTACATTCTAGTGTCTAATTGAATAGCGATTACAATACTAAA<br/>TGAGCATTAGTGAACACTTTCTGTGTAACAAAAGCGGAGTACCTTCATTGTATTTAATGTAG<br/>CTATGATTACACCACCAGTGTGGGCTTATCATTACAAATATTGTTTTGGAAATCTTGA<br/>GATATTAGATTATAAATAGTTCTCC</p>                                                                                                                                                                                                                                                                                               | X        |
| <p>agtggcacagcagttaggTAGGGACTAGGTGGGAACCTTGTGAGGATGTGGTAGGGGCTGTGTGAT<br/>TTAACAGCGAGAGGCATAGAGAACCTCAGGCTGGGCCATCTGGGTAGCGAAAACCTTTAT<br/>ACCTTGAGAATACCTACAAAGCTGGGTGGCACAGCACTTGCCTGGCATCAAGGAGGCCCT<br/>GGGTTTTAGCCCCAGCACCAGGTAGAGGAAGGAGAGGGAGGGAAAATGGGGTGGGGAA<br/>TGAATATCCATAAAAATAGCTAATTGGATTGGAGTTCAATTGTTGAAAACCTTAAAAGATT<br/>TTTATGCTACTCTTCTGCATATGGCTGTCCCTATTACTCAAGGTTCTGTTTGAGCAATGACT<br/>GTGTTTTACCCTTATAACCTAGTGAGGTAAGTGTCTCAGGACGTCCCATAGCTCTGTCC<br/>CAACCCCATAGCCTTTTCTAGTTCTGCATGAACTAGTTCTTCTAGAGAAGGAACCTGGA<br/>TGTTCTCGCCCATACCTAGCTTTCTACACTACTCCAGGTTACCCCTCCAACCTGTTTC<br/>CTCTGCTTAACCTTGCCAGCCCTTGCTTGCACCTGGCCTAGCTAGGAGAAAGGGCCCCTT<br/>GGGGTCTCATACGTGGGTCTGCAGGGGTAGCACTGTGCCCTGTCAGCATGTCTGATGG<br/>GCATCGAGAATTTGTTTCTCTAAGAGAGAAGAATGAGGCTCGGTCTAGACTCACCCCA<br/>CTGGCCAACCAATGCCCCAGGACCCATTCCAGCACCACAAACACTTTTAGACTAAGAT<br/>GATTAAG</p> | 6        |

|                                                                                                                                                                                                                                                                                                                                                                                                                                                                                                                                                                                                                                                                                                                                                                                                                                                                                                                                                                                                                                                                        |           |
|------------------------------------------------------------------------------------------------------------------------------------------------------------------------------------------------------------------------------------------------------------------------------------------------------------------------------------------------------------------------------------------------------------------------------------------------------------------------------------------------------------------------------------------------------------------------------------------------------------------------------------------------------------------------------------------------------------------------------------------------------------------------------------------------------------------------------------------------------------------------------------------------------------------------------------------------------------------------------------------------------------------------------------------------------------------------|-----------|
| <p>agtggcacagcagtaggGTGTTCTTCAGAGTCACATCTCTTCTCTAAAGCTTTGAAGAACCACCT<br/>GTCTGAGGGCCAGAAGCTCTTGTGAGTATCTGCTGATGCAGAGTTAGAAACAGCTCTACT<br/>AAGTCCTCAGCC</p>                                                                                                                                                                                                                                                                                                                                                                                                                                                                                                                                                                                                                                                                                                                                                                                                                                                                                                             | <p>14</p> |
| <p>agtggcacagcagtaggGACACTTAGGGGATGCAATTCTTTGTCTTTCACTGCATATGCACCAGT<br/>GAGTTACTCGGGATCCAGTGGAGAGCTTCGAATCCATGCTCATGGTAGTGGTCTTGACTA<br/>AACTTAGTGGGTCACAACACAAAAACAAAGCCAAACAAAAAGCATCAAAGTGGGGTTG<br/>GGCCTTGAAGATAGAGGGAGCCTGGGAATTAATTATTAATTAATTGAAAAACCAGAGAGCT<br/>TGAAAATATCAACTCTATCAACCCTGCCATACAGAAGCACAACATGAGCAACTAATTATGAT<br/>AATTCGGGGTTCACCCGGTCCACATATCACCTAGAATCTACATCTCAACAAGTTCTGGCAA<br/>AATTC</p>                                                                                                                                                                                                                                                                                                                                                                                                                                                                                                                                                                                                                                              | <p>1</p>  |
| <p>agtggcacagcagtaggAACGAAGAAGCACTTTTTAAAACAATGGCATTGGGAAGAAGTCACACC<br/>ATCACATCTGGGACTACTCCAGTGGGCTTTATTGGTTACCTATGGCCTGGCTAAAGCACTG<br/>AA</p>                                                                                                                                                                                                                                                                                                                                                                                                                                                                                                                                                                                                                                                                                                                                                                                                                                                                                                                      | <p>13</p> |
| <p>agtggcacagcagtaggGTGCCTTGGGCACAAGCTGTCCAGCGTCTCTTTCCACCGCATTCTT<br/>CCCCCTTCTCAGAAGCTGCTAACATCTGCAGAATGATCCATTTTCTTCGCACGCATGCTC<br/>GTTTTCAACATCAAGTGCTTCTACTCAGCTTGTTCTCTCCTTCCGATGCAGTGACGCCTC<br/>TGGGGACCTGCCATTAATCATTCTTAATTTGATCCCCTTCTTGGTTCCCACTGGACTTGT<br/>GTTACAGGCCTCTCCTGCTCAACATAATCACTCCAACCTGTGATTTCTCCTTCTCTGTGAGC<br/>TGCTTCTCCATTTAAATAGCTCGCTCATAAACAGCATCATTGAGACTGAAGATAAGTAGAT<br/>GTACAAGTGCCGGTGCACCTGAAGCCTCCCATCGGGCAAACCCTCATCCTCCAC</p>                                                                                                                                                                                                                                                                                                                                                                                                                                                                                                                                                                                              | <p>3</p>  |
| <p>agtggcacagcagtaggGAATCTGAATTCTTCTTTATATAACCTCTTCTAACCATGAGTTCTAGA<br/>CCTGCTTCTGACCCATGAATAAACAGTTAGGGAATTATTGTTAAAGGAAGGAATCACACCC<br/>AGTGCAAGTTTGACCTACCCAGACAATCCTAAAAGCTTCTTTAGGTGGCTCAGAGTAGCT<br/>ACATTTTTGTTTTCTTAAAGATTAACATCTATCCTTTGTCTCTAAAACCAACAATCAGCC<br/>CGTGAATTGTGAGGAAATAAATGATCGTCAAAATTTACTTGACATAGTAAGGGCTTGG<br/>GAATCCAGTGATATTACTGCCATGAAAATGGTATACCCAGCATGCATGGGAAAGAAT<br/>AAGAGTTATCACATTTAGAAAGAAAGAATTCCTCTGTATCTCTCATAAGACAATATTTAGTT<br/>CTTCTTTTTTTGTTTGTCTTTTTGTTTCTCCGAAATATAGGGATCTTTGCTTGA<br/>CTAAAACACCAAGGTGGCTTTGTATATACACAGTCTGGAATAAGCCTTTAAGGGGAGCTCA<br/>TAAACTGTTGCCCGTACATAATTACTGTATTTAGCCAGCTACAGTGAATGCTAAAGGTAAC<br/>CTAGAATACTGCATTTTAGGTGGGGAACCACCATTGAAAAGAAGAAATTATTCAGCTCTTT<br/>TAACATAATGCTATTTTCACTTCTAGCTATTGATGAGATGAATACTCATCAATGGATGATC<br/>GAGAATTATGGGCTCTTCTATATATGGGATTTTCCAGTCAGTTAACTTTATATCTTCTTAT<br/>ATTGGTTGACTACCTGAAATATTTTGTGACAATGGTTGTAGGAAAAAGAATACAAAACAG<br/>GAACTCCACCAAATAGCGTTGGCTCTTGTCTCCCTAAGTTTAAAGACATAGAATGGGCAA<br/>AGGAGGGATAGTTCCTCAAAAACATTAGCCAATTTCTCTCTAATCA</p> | <p>6</p>  |
| <p>agtggcacagcagtaggAGGCAGAGGCAGGCAGATTCTGAGTTCAAGGCCAGCGTGGTCAAC<br/>AGAGTGAGTTCCAAGACAGTCCTGTTACAATAAGAAATCTTGTCTCAAAAAACAAAAACAA<br/>AAACAAAAATTACAGCAGTGGAACAGCCTAAGAAATTTAGGAAACAGTGTCACCTAGTG<br/>GTCACACACGGCACTGCAGAAATGTTAACTTGATTTTCGTGTCCCATTTCACTTACAAAGAC<br/>CACGCTGACCCTGAAATTAGAGAACCAGTTGCCTGTGCTTCCCAAATGTTGTGATTAAGG<br/>AGAGAGACACCATGCCAAGATTCTGCCCTACTTTGAAACAGCCTCTCAGGGCTGTTTTT<br/>ACTCTCAGGTAATTTCTGAATTCTATTCTGCCTCTTAGTGGCTGGCATAAATCAAATTAT<br/>AAAGACTCTTTTGGTCTGGAGAGTTCACTGAACTATCCAGAAATGAAAACAGCCAAGTGGG<br/>TGCTGCAGCTCACCTCCAGCTCTATTAGTTCCAGGGAGACTCCAGTAGCCAGAGCATT<br/>TCTCCGCTGCAATTCGGCTACCTAAAGGAGGAAGGCTTTCTTCCAGAATATCTCCCTTTA<br/>ACTCTTTTTTAATGTGTTATTATGTGTGGCCATGATGTTGGAGAATTGCCTTGGTACACAGC</p>                                                                                                                                                                                                                                                                                                                      | <p>1</p>  |

|                                                                                                                                                                   |  |
|-------------------------------------------------------------------------------------------------------------------------------------------------------------------|--|
| TGGAGGCCATGTGGAGTTGGCCTCTGCTTCCACCTTCGCCATGGGTTCCAGGAAGTGAAC<br>TCAGATCAATAGGCTTGCCTGGAAAAGAGCTTTAGGCACTGAGCCATGCCATCGACCCTG<br>TATAGTTCAAGGATGAATGTCAACCAGGCTTAG |  |
|-------------------------------------------------------------------------------------------------------------------------------------------------------------------|--|

**Supplementary Table 1.** Transposition site sequences are shown for MEF 3T3 cells as determined by nrLAM PCR, TOPO TA cloning, and sequencing. Each sequence begins with an 18bp sequence (in lower case letters) that indicates the priming site specific for the DNA linker sequence that was ligated to the unknown genomic DNA ends of captured biotinylated sequences from nrLAM PCR. The remaining sequence for each sample contains the mouse genomic sequence connected to the linker, (listed in the last column of the tables). Sequences were localized by BLAST analysis.

| <i>In vivo</i> transposition site sequences in C57Bl/6 mice                                                                                                                                                                                                                                                                                                                                                                                                                                                                                                                                                                                                                                                                                                                                                                                                     | mCh. No. |
|-----------------------------------------------------------------------------------------------------------------------------------------------------------------------------------------------------------------------------------------------------------------------------------------------------------------------------------------------------------------------------------------------------------------------------------------------------------------------------------------------------------------------------------------------------------------------------------------------------------------------------------------------------------------------------------------------------------------------------------------------------------------------------------------------------------------------------------------------------------------|----------|
| agtggcacagcagttaGGGTGTTCTTCAGAGTCACATCTCTTCTCTAAAGCTTTGAAGAACCACC<br>TGTCTGAGGGCCATAAGCTCTTGTGAGTATCTGCTGATGCAGAGTTAGAAACAGCTCTAC<br>TAAGTCCTCAGCC                                                                                                                                                                                                                                                                                                                                                                                                                                                                                                                                                                                                                                                                                                              | 14       |
| agtggcacagcagttaggAAGTAGCAACAAAATAGTTTTATGGCTGGGGCTCACCACAGTATGTG<br>AAACTCTATTTAAAAGGTTGAATCATTAGGAGGTTTGAGCAGCACTGGTTTAAAGTAAGTGA<br>ATTGAAAAACACAACATGAGAGTATAAAGATGAGAAGCTGGACTTTTATGACATACTTTGG<br>ATTTTTTTTTCTTTTCTACGAAAAAGAAAGCAGAACAGTGCATTGTCCTTTAAAACCTTGAAG<br>TCTCTAGTCCTAAGCTAACGAATTCATTTCCACATTTGACTTAATGCCCCAGAGATAACAG<br>TCCTTTGGAATTTTTTTCATTTTCAGTTACATTCTAGTGTCTAATTGAATAGCGATTACAATAC<br>TAAATGAGCATTAGTGAACACTTTCTGTGTAACAAAAGCGGAGTACCTTCATTGTATTTAA<br>TGTAGCTATGATTCATCCACCACCAGTGTGGGCTTATCATTACAAATATTGTTTTGGAAAT<br>TCTTGAGATATTAGATTATAAATAGTTCTCCTTTTTTCCATTCTTTTTAAAAACAATTATCTTC<br>AATTTTTATTAACATTTATTTATT                                                                                                                                                                                                                  | X        |
| agtggcacagcagttaggAACGAAGAAGCACTTTTTAAAACAATGGCATTGGAAGAAGTGCAC<br>CATCACATCTGGGACTACTCCAGTGGGCTTTGTTGGTTACCTATGGCCTGGCTAAAGCAC<br>TGAA                                                                                                                                                                                                                                                                                                                                                                                                                                                                                                                                                                                                                                                                                                                         | 13       |
| agtggcacagcagttaggAAGTAGCAACAAAATAGATTATGGCTGGGGCTCACCACAGTATGTGA<br>AACTCTATTAACACTTTGAATCATTAGGAGGT                                                                                                                                                                                                                                                                                                                                                                                                                                                                                                                                                                                                                                                                                                                                                           | X        |
| ccgataaaacacatgcgtcaTGATTAGAGAGAGAAATTGGCTAATGTTTTGAGGAACTATCCCTC<br>CTTTGCCATTCTATTGTCTTAACTTAGGGAGAACAAGAGCCAACGCTATTTGGTGGGA<br>GTTCTGTGTTTGTATTCTTTTCTACAACCATTGTGACAAAAATATTTTCAGGTAGTACAAC<br>CAATATAAGAAGATATAAAGTTTAACTGACTGGAAAAATCCCATATATAGAAGAGCCATA<br>ATTCTCGATCATCCATTGATGAGTATTCATCTCATCAATAGCTAGAGAAATGAAATAGCAT<br>TATGTTAAAAGAGCTGAATAATTTCTTCTTTTCAATGGTGGTTCACCTAAAAATGCAG<br>TATTCTAGGTTACCTTTAGCATTCACTGTAGCTGGCTAAATACAGTAATTATGTACGGGCA<br>ACAGTTTATGAGCTCCCTTTAAAGGCTTATTCCAGACTGTGTATATACAAAGCCACCTTGG<br>TGTTTTAGTCAAGCAAAGATCCCTATATTTTCGGAGAAAACAAACAAAAGACAAACAAACA<br>AAAAAGAAGAACTAAAATATTGTCTTATGAGAGACACAGAGGAATTCTTTCTTTCTAAAT<br>GTGATAACTCTTATTCTTTCCCATGCATGCTGGGTATACCAATTTTCATGGCATTATAATA<br>TCACTGGATTCTCCAAGCCCTTACTATGTCAAGAAAATATTTGACGATTCATATTTATTTCT<br>GATATTCACGTGCTGATTCGTTGAGTTTTAGAGACCAAGGATAGATAGCTTAAT | 6        |

**Supplementary Table 2.** Transposition site sequences are shown for the mouse liver as determined by nrLAM PCR, TOPO TA cloning, and sequencing. Each sequence begins with an 18bp sequence (in lower case letters) that indicates the priming site specific for the DNA linker sequence that was ligated to the unknown genomic DNA ends of captured biotinylated sequences from nrLAM PCR. The remaining sequence for each sample contains the mouse genomic sequence connected to the linker, (listed in the last column of the tables). Sequences were localized by BLAST analysis.
